# Supplementary material for: Ecology of fear in highly invasive fish revealed by robots
Source: PubMed Central journal article supplement (PMC8786638; doi:10.1016/j.isci.2021.103529), 2021-12-16
Supplement: mmc1.pdf [file mmc1.pdf]

**iScience, Volume 25**

**Supplemental information**

**Ecology of fear in highly  
invasive fish revealed by robots**

**Giovanni Polverino, Vrishin R. Soman, Mert Karakaya, Clelia Gasparini, Jonathan P. Evans, and Maurizio Porfiri**

This PDF file includes

**Fig. S1.** Average space use of mosquitofish and tadpoles in the experimental arena, Related to Fig. 2a, and Table 1.

**Table S1.** Results from the random-factor structure of the linear-mixed models on group-behaviour measures, Related to Fig. 2a and Table 1.

**Table S2.** Transfer entropy between mosquitofish and tadpoles within each treatment, Related to Fig. 3.

**Table S3.** Results from the random-factor structure of the linear-mixed models for mosquitofish, with routine activity and feeding rate as dependent variables, Related to Fig. 2b, and Table 2.

**Table S4.** Results from the random-factor structure of the linear-mixed models for mosquitofish, with body condition and shape (Relative Warps score 2, RW2) as dependent variables, Related to Fig. 2c and 4, and Table 3.

**Table S5.** Results from linear-mixed models for mosquitofish, with body shape (Relative Warps score, RWs) tested separately for males (RW1 and RW3) and females (RW1, RW3, and RW4) as dependent variables, Related to Fig. 4.

**Table S6.** Relative Warps scores (RWs) describing variation in body shape of male and female mosquitofish separately, Related to Fig. 4.

**Table S7.** Results from univariate linear-mixed models on group-behaviour measures before treatments started (i.e. week one), Related to Fig. 2a and Table 1.

## FIGURES

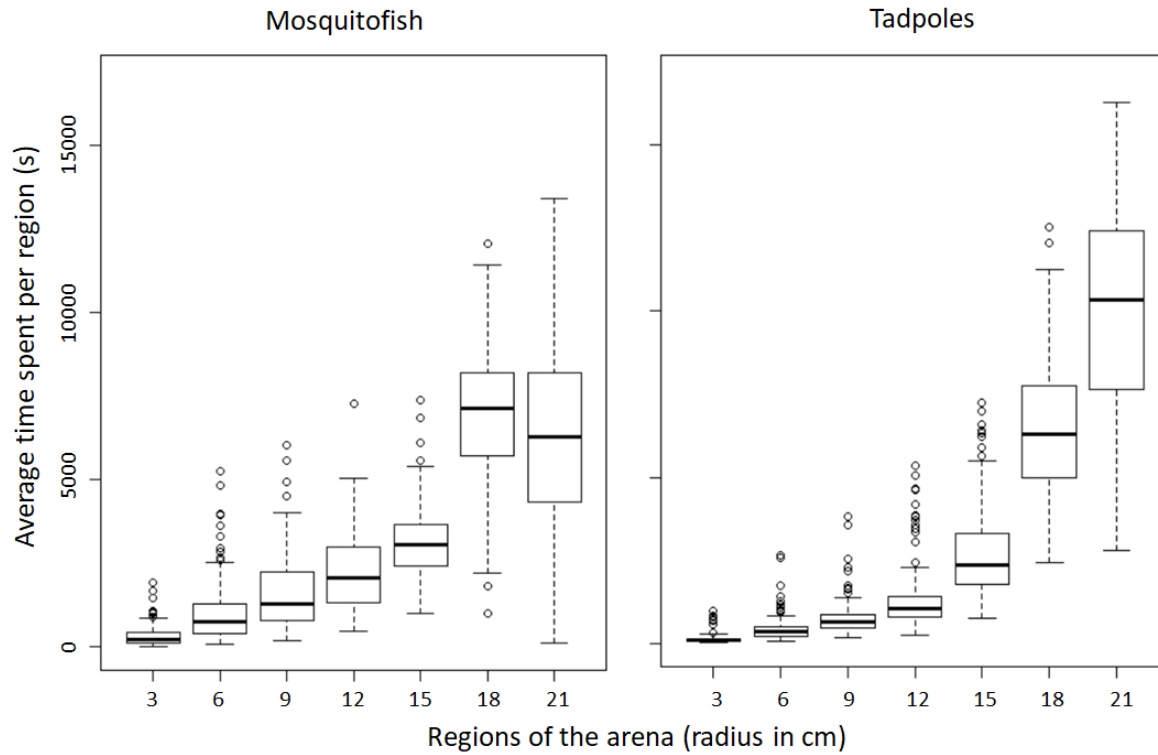

**Fig. S1. Average space use of mosquitofish and tadpoles in the experimental arena, Related to Fig. 2a, and Table 1.** The space use was calculated separately for each species by dividing the circular arena in seven concentric zones, each one of 3 cm in radius. These preliminary analyses indicated comparable scores for the time spent in regions between 0-15 and 15-21 radiuses from the centre of the arena for both species. Thus, intermediate regions were condensed into two main regions: a central (0-15 cm radius) and an external region (15-21 cm radius).

## TABLES

**Table S1. Results from the random-factor structure of the linear-mixed models on group-behaviour measures, Related to Fig. 2a and Table 1.** The dependent variables, cohesion (average furthest neighbour distance, AFND, and average inter-individual distance, AIID), activity (turning rate and distance swam), and space use (time in the central region), are tested separately. Treatment (non-exposed and robot-exposed), week (two to six), interaction, and trial (two repeated measures per tank per week), are included as fixed effects in each model. Random intercepts are also included in each model to account for repeated measures of mesocosm tanks.

| Model                         | Mosquitofish          |                       | Tadpoles              |                       | Mosquitofish & tadpoles |       |
|-------------------------------|-----------------------|-----------------------|-----------------------|-----------------------|-------------------------|-------|
|                               | Variance              | SD                    | Variance              | SD                    | Variance                | SD    |
| <b>AFND</b>                   |                       |                       |                       |                       |                         |       |
| Tank                          | 0.217                 | 0.465                 | 0.046                 | 0.215                 | 0.331                   | 0.575 |
| Residuals                     | 5.350                 | 2.313                 | 2.078                 | 1.441                 | 2.630                   | 1.622 |
| <b>AIID</b>                   |                       |                       |                       |                       |                         |       |
| Tank                          | 0.130                 | 0.361                 | 0.061                 | 0.248                 | 0.212                   | 0.461 |
| Residuals                     | 2.472                 | 1.572                 | 1.044                 | 1.022                 | 1.417                   | 1.190 |
| <b>Turning rate</b>           |                       |                       |                       |                       |                         |       |
| Tank                          | 0.006                 | 0.077                 | 0.015                 | 0.125                 | -                       | -     |
| Residuals                     | 0.042                 | 0.206                 | 0.246                 | 0.496                 | -                       | -     |
| <b>Distance Swam</b>          |                       |                       |                       |                       |                         |       |
| Tank                          | 1.814 10 <sup>7</sup> | 4.259 10 <sup>3</sup> | 1.500 10 <sup>7</sup> | 3.873 10 <sup>3</sup> | -                       | -     |
| Residuals                     | 4.789 10 <sup>8</sup> | 2.188 10 <sup>4</sup> | 2.428 10 <sup>8</sup> | 1.558 10 <sup>4</sup> | -                       | -     |
| <b>Time in central region</b> |                       |                       |                       |                       |                         |       |
| Tank                          | 1.985 10 <sup>6</sup> | 1.409 10 <sup>3</sup> | 0.001                 | 0.001                 | -                       | -     |
| Residuals                     | 7.030 10 <sup>6</sup> | 2.651 10 <sup>3</sup> | 4.382 10 <sup>6</sup> | 2.093 10 <sup>3</sup> | -                       | -     |

**Table S2. Transfer entropy between mosquitofish and tadpoles within each treatment, Related to Fig. 3.** Computation use binary symbolic time series of average magnitude of group turning rate and presence in the central region of the arena. Values, in bits, indicate the mean transfer entropy across trials for each treatment separately, with 95% percentile of the surrogate data in parentheses. Significant results are in bold.

|                            | Non-exposed                                                              |                                                                          | Robot-exposed                                                            |                                                                 |
|----------------------------|--------------------------------------------------------------------------|--------------------------------------------------------------------------|--------------------------------------------------------------------------|-----------------------------------------------------------------|
|                            | $TE_{\text{Mosq} \rightarrow \text{Tadp}}$                               | $TE_{\text{Tadp} \rightarrow \text{Mosq}}$                               | $TE_{\text{Mosq} \rightarrow \text{Tadp}}$                               | $TE_{\text{Tadp} \rightarrow \text{Mosq}}$                      |
| Turning rate               | $2.24 \cdot 10^{-4}$<br>( $2.57 \cdot 10^{-4}$ )<br>$p = 0.303$          | $1.73 \cdot 10^{-4}$<br>( $2.59 \cdot 10^{-4}$ )<br>$p = 0.930$          | $2.53 \cdot 10^{-4}$<br>( $2.52 \cdot 10^{-4}$ )<br>$p = \mathbf{0.040}$ | $1.90 \cdot 10^{-4}$<br>( $2.45 \cdot 10^{-4}$ )<br>$p = 0.633$ |
| Presence in central region | $1.66 \cdot 10^{-3}$<br>( $1.58 \cdot 10^{-3}$ )<br>$p < \mathbf{0.001}$ | $1.81 \cdot 10^{-3}$<br>( $1.75 \cdot 10^{-3}$ )<br>$p < \mathbf{0.001}$ | $1.58 \cdot 10^{-3}$<br>( $1.57 \cdot 10^{-3}$ )<br>$p = \mathbf{0.024}$ | $1.48 \cdot 10^{-3}$<br>( $1.54 \cdot 10^{-3}$ )<br>$p = 0.623$ |

**Table S3. Results from the random-factor structure of the linear-mixed models for mosquitofish, with routine activity and feeding rate as dependent variables, Related to Fig. 2b, and Table 2.** Treatment (non-exposed and robot-exposed), week (two to seven), interaction, and trial (two repeated measures per tank per week) are included as fixed effects in each model. Random intercepts are also included in each model to account for repeated measures of mesocosm tanks.

| Model            | Variance              | SD                    |
|------------------|-----------------------|-----------------------|
| Routine activity |                       |                       |
| Tank             | 2.197                 | 1.482                 |
| Residuals        | 4.348 10 <sup>1</sup> | 6.594                 |
| Feeding rate     |                       |                       |
| Tank             | 3.671                 | 1.916                 |
| Residuals        | 1.253 10 <sup>2</sup> | 1.119 10 <sup>1</sup> |

**Table S4. Results from the random-factor structure of the linear-mixed models for mosquitofish, with body condition and shape (Relative Warps score 2, RW2) as dependent variables, Related to Fig. 2c and 4, and Table 3.** Treatment (non-exposed and robot-exposed), body size/weight, mesocosm tank, trial (two repeated measures per tank per week), and treatment  $\times$  trial are included as fixed effects in each model. Body condition was tested for males and females together, so models also included sex and its interaction with treatment and trial. Random intercepts are also included in each model to account for repeated measures of individual IDs.

| Model            | Variance              | SD     |
|------------------|-----------------------|--------|
| Body condition   |                       |        |
| Individual       | 0.009                 | 0.097  |
| Residuals        | 0.005                 | 0.069  |
| Body shape ♂ RW2 |                       |        |
| Individual       | $2.172 \cdot 10^{-5}$ | 0.005  |
| Residuals        | $1.568 \cdot 10^{-4}$ | 0.012  |
| Body shape ♀ RW2 |                       |        |
| Individual       | <0.001                | <0.001 |
| Residuals        | <0.001                | 0.015  |

**Table S5. Results from linear-mixed models for mosquitofish, with body shape (Relative Warps score, RWs) tested separately for males (RW1 and RW3) and females (RW1, RW3, and RW4) as dependent variables, Related to Fig. 4.** Treatment (non-exposed and robot-exposed), trial (two repeated measures for each individual—before and after treatment), treatment  $\times$  trial, body size, and mesocosm tank are included as fixed effects, and random intercepts (individual ID) are also included in each model. Analysis of variance was performed with Satterthwaite’s method, and false discovery rate adjusted p-values ( $p$ ) are presented.

| Model                    |          |           |          |          |
|--------------------------|----------|-----------|----------|----------|
| RW1 ♂                    | Mean sq. | <i>df</i> | <i>F</i> | <i>p</i> |
| Treatment                | <0.001   | 1,22      | 0.125    | 0.763    |
| Trial                    | <0.001   | 1,37      | 0.694    | 0.717    |
| Tank                     | <0.001   | 10,23     | 0.777    | 0.763    |
| Body size                | 0.001    | 1,53      | 5.184    | 0.142    |
| Treatment $\times$ trial | <0.001   | 1,32      | 1.363    | 0.661    |
|                          | Variance | SD        |          |          |
| Individual               | <0.001   | 0.021     |          |          |
| Residuals                | <0.001   | 0.017     |          |          |
| RW1 ♀                    | Mean sq. | <i>df</i> | <i>F</i> | <i>p</i> |
| Treatment                | <0.001   | 1,23      | 1.555    | 0.394    |
| Trial                    | <0.001   | 1,37      | 2.109    | 0.394    |
| Tank                     | <0.001   | 10,23     | 0.437    | 0.959    |
| Body size                | 0.001    | 1,28      | 3.715    | 0.336    |
| Treatment $\times$ trial | <0.001   | 1,34      | 0.170    | 0.896    |
|                          | Variance | SD        |          |          |
| Individual               | <0.001   | 0.012     |          |          |
| Residuals                | <0.001   | 0.017     |          |          |
| RW3 ♂                    | Mean sq. | <i>df</i> | <i>F</i> | <i>p</i> |
| Treatment                | <0.001   | 1,22      | 0.043    | 0.880    |
| Trial                    | <0.001   | 1,37      | 3.997    | 0.278    |
| Tank                     | <0.001   | 10,23     | 1.521    | 0.458    |
| Body size                | <0.001   | 1,34      | 1.302    | 0.458    |
| Treatment $\times$ trial | <0.001   | 1,33      | 0.335    | 0.744    |
|                          | Variance | SD        |          |          |
| Individual               | <0.001   | 0.004     |          |          |
| Residuals                | <0.001   | 0.012     |          |          |
| RW3 ♀                    | Mean sq. | <i>df</i> | <i>F</i> | <i>p</i> |
| Treatment                | <0.001   | 1,23      | 3.346    | 0.210    |
| Trial                    | 0.001    | 1,36      | 5.942    | 0.105    |
| Tank                     | <0.001   | 10,23     | 0.879    | 0.973    |
| Body size                | <0.001   | 1,27      | 0.003    | 0.999    |
| Treatment $\times$ trial | <0.001   | 1,34      | 0.111    | 0.973    |
|                          | Variance | SD        |          |          |
| Individual               | <0.001   | 0.006     |          |          |
| Residuals                | <0.001   | 0.014     |          |          |
| RW4 ♀                    | Mean sq. | <i>df</i> | <i>F</i> | <i>p</i> |
| Treatment                | <0.001   | 1,57      | 1.153    | 0.398    |
| Trial                    | <0.001   | 1,57      | 4.625    | 0.094    |
| Tank                     | <0.001   | 10,57     | 0.275    | 0.999    |
| Body size                | 0.001    | 1,57      | 6.539    | 0.068    |
| Treatment $\times$ trial | <0.001   | 1,57      | 1.078    | 0.398    |
|                          | Variance | SD        |          |          |
| Individual               | <0.001   | <0.001    |          |          |
| Residuals                | <0.001   | 0.012     |          |          |



**Table S6. Relative Warps scores (RWs) describing variation in body shape of male and female mosquitofish separately, Related to Fig. 4.** Singular values (SV), percentage explained for each relative warp (%), and cumulative percentage explained (Cum %) are shown.

| Males |      |       |        | Females |         |       |        |
|-------|------|-------|--------|---------|---------|-------|--------|
| RW    | SV   | %     | Cum %  | RW      | SV      | %     | Cum %  |
| 1     | 0.24 | 44.92 | 44.92  | 1       | 0.16989 | 26.54 | 26.54  |
| 2     | 0.15 | 17.15 | 62.07  | 2       | 0.14523 | 19.40 | 45.94  |
| 3     | 0.11 | 9.46  | 71.53  | 3       | 0.12591 | 14.58 | 60.52  |
| 4     | 0.09 | 6.76  | 78.30  | 4       | 0.11058 | 11.25 | 71.77  |
| 5     | 0.09 | 6.28  | 84.58  | 5       | 0.09395 | 8.12  | 79.89  |
| 6     | 0.08 | 4.72  | 89.30  | 6       | 0.08010 | 5.90  | 85.79  |
| 7     | 0.07 | 3.39  | 92.69  | 7       | 0.06186 | 3.52  | 89.31  |
| 8     | 0.05 | 2.05  | 94.74  | 8       | 0.05822 | 3.12  | 92.42  |
| 9     | 0.04 | 1.43  | 96.17  | 9       | 0.04502 | 1.86  | 94.29  |
| 10    | 0.04 | 1.11  | 97.28  | 10      | 0.04146 | 1.58  | 95.87  |
| 11    | 0.03 | 0.83  | 98.11  | 11      | 0.03707 | 1.26  | 97.13  |
| 12    | 0.03 | 0.66  | 98.77  | 12      | 0.03287 | 0.99  | 98.13  |
| 13    | 0.02 | 0.50  | 99.27  | 13      | 0.02826 | 0.73  | 98.86  |
| 14    | 0.02 | 0.35  | 99.62  | 14      | 0.02302 | 0.49  | 99.35  |
| 15    | 0.02 | 0.23  | 99.85  | 15      | 0.02018 | 0.37  | 99.72  |
| 16    | 0.01 | 0.15  | 100.00 | 16      | 0.01731 | 0.28  | 100.00 |

**Table S7. Results from univariate linear-mixed models on group-behaviour measures before treatments started (i.e. week one), Related to Fig. 2a and Table 1.** The dependent variables, social cohesion (AFND and AIID), activity (turning rate and distance swam), and space use (time in the central region), are tested with treatment (non-exposed and robot-exposed) and trial (two repeated measures per tank) as fixed effects, and mesocosm tank as the random effect (random intercepts). Analysis of variance was performed with Satterthwaite's method.

| Model                  | Mean sq.              | Mosquitofish |          |          | Tadpoles              |           |          |          | Mosquitofish & tadpoles |           |          |          |
|------------------------|-----------------------|--------------|----------|----------|-----------------------|-----------|----------|----------|-------------------------|-----------|----------|----------|
|                        |                       | <i>df</i>    | <i>F</i> | <i>p</i> | Mean sq.              | <i>df</i> | <i>F</i> | <i>p</i> | Mean sq.                | <i>df</i> | <i>F</i> | <i>p</i> |
| AFND                   |                       |              |          |          |                       |           |          |          |                         |           |          |          |
| Treatment              | 1.489                 | 1,10         | 0.603    | 0.455    | 0.363                 | 1,10      | 0.160    | 0.698    | 3.701                   | 1,10      | 0.952    | 0.352    |
| Trial                  | 4.366                 | 1,11         | 1.769    | 0.210    | 3.066                 | 1,11      | 1.350    | 0.270    | 1.138 10 <sup>1</sup>   | 1,11      | 2.928    | 0.115    |
| AIID                   |                       |              |          |          |                       |           |          |          |                         |           |          |          |
| Treatment              | 0.366                 | 1,10         | 0.277    | 0.610    | 0.176                 | 1,10      | 0.161    | 0.697    | 1.277                   | 1,10      | 0.636    | 0.444    |
| Trial                  | 0.429                 | 1,11         | 0.324    | 0.580    | 1.494                 | 1,11      | 1.365    | 0.267    | 2.785                   | 1,11      | 1.386    | 0.264    |
| Turning rate           |                       |              |          |          |                       |           |          |          |                         |           |          |          |
| Treatment              | 0.044                 | 1,10         | 2.851    | 0.122    | 0.195                 | 1,10      | 1.257    | 0.288    | -                       | -         | -        | -        |
| Trial                  | 0.071                 | 1,11         | 4.544    | 0.056    | 0.007                 | 1,11      | 0.047    | 0.833    | -                       | -         | -        | -        |
| Distance swam          |                       |              |          |          |                       |           |          |          |                         |           |          |          |
| Treatment              | 3.189 10 <sup>8</sup> | 1,10         | 1.939    | 0.194    | 1.913 10 <sup>6</sup> | 1,10      | 0.022    | 0.885    | -                       | -         | -        | -        |
| Trial                  | 1.626 10 <sup>8</sup> | 1,11         | 0.989    | 0.341    | 9.608 10 <sup>7</sup> | 1,11      | 1.096    | 0.317    | -                       | -         | -        | -        |
| Time in central region |                       |              |          |          |                       |           |          |          |                         |           |          |          |
| Treatment              | 6.180 10 <sup>6</sup> | 1,10         | 0.842    | 0.380    | 2.601 10 <sup>6</sup> | 1,10      | 0.544    | 0.478    | -                       | -         | -        | -        |
| Trial                  | 2.627 10 <sup>7</sup> | 1,11         | 3.580    | 0.085    | 6.799 10 <sup>6</sup> | 1,11      | 1.422    | 0.258    | -                       | -         | -        | -        |
